# Supplementary material for: Soil fungal and bacterial communities in southern boreal forests of the Greater Khingan Mountains and their relationship with soil properties
Source: PubMed Central journal article supplement (PMC7745012; doi:10.1038/s41598-020-79206-0), 2020-12-16
Supplement: 41598_2020_79206_MOESM1_ESM.pdf [file 41598_2020_79206_MOESM1_ESM.pdf]

# **Soil Fungal and Bacterial Communities in Southern Boreal Forests of the Greater Khingan Mountains and their Relationship with Soil Properties**

**Thi-Minh-Dien Vuong<sup>1,2#</sup>, Jian-Yong Zeng<sup>3,#</sup>, Xiu-Ling Man<sup>1,\*</sup>**

<sup>#</sup> Thi-Minh-Dien Vuong and Jian-Yong Zeng contributed equally to this work

<sup>\*</sup> Xiu-Ling Man is the corresponding author

<sup>1</sup>Department of Soil and Water Conservation and Desertification Control, School of Forestry, Northeast Forestry University, Harbin, China, 150040

<sup>2</sup> Department of International Cooperation, Center of Technology Development and Agricultural Extension, Vietnam Academy of Agricultural Sciences, Hanoi, Vietnam, 100803

<sup>3</sup> Department of Forest Protection, School of Forestry, Northeast Forestry University, Harbin, China, 150040

**\* Correspondence:**

Xiu-Ling, Man; [mannefu@126.com](mailto:mannefu@126.com)

## Supplementary materials

### Supplementary table

**Table S1 Sequence information**

| Gene     | Region    | Samples | Clean reads | Bases (bp) | length (bp) |
|----------|-----------|---------|-------------|------------|-------------|
| ITS gene | ITS1-ITS2 | 12      | 805820      | 197088266  | 245         |
| 16S rDNA | V3-V4     | 12      | 641184      | 266799031  | 416         |

**Table S2 Primers in the present study.**

| Primer name | Sequence (5'→3')       | Usage             |
|-------------|------------------------|-------------------|
| 338F        | ACTCCTACGGGAGGCAGCAG   | 16S amplification |
| 806R        | GGACTACHVGGGTWTCTAAT   |                   |
| ITS1F       | CTTGGTCATTTAGAGGAAGTAA | ITS amplification |
| ITS2R       | GCTGCGTTCTTCATCGATGC   |                   |

**Table S3 Soil properties in southern boreal forests in Greater Khingan Mountains (full edition)**

| Soil properties     | Birch         | Aspen          | Larch          | Pine           | Birch VS Aspen | Larch VS Pine |
|---------------------|---------------|----------------|----------------|----------------|----------------|---------------|
| NH <sub>4</sub> -N  | 20.28 ± 0.49  | 19.45 ± 0.63   | 26.33 ± 1.68   | 31.41 ± 0.63   | NS             | **            |
| NO <sub>3</sub> -N  | 1.51 ± 0.03   | 1.51 ± 0.07    | 1.53 ± 0.03    | 2.21 ± 0.21    | NS             | **            |
| Dissolved organic C | 99.66 ± 8.92  | 87.52 ± 5.20   | 108.02 ± 10.47 | 182.36 ± 9.27  | NS             | **            |
| Available P         | 27.98 ± 0.88  | 31.50 ± 0.75   | 18.20 ± 0.25   | 22.87 ± 0.71   | **             | **            |
| Available K         | 103.05 ± 5.16 | 289.79 ± 14.99 | 256.47 ± 24.27 | 221.37 ± 12.63 | **             | NS            |
| Total organic C     | 47.40 ± 2.51  | 39.57 ± 2.01   | 83.84 ± 0.90   | 88.54 ± 6.02   | *              | NS            |
| Total N             | 3.35 ± 0.13   | 2.88 ± 0.12    | 4.32 ± 0.29    | 4.60 ± 0.02    | *              | NS            |
| Total P             | 1.47 ± 0.10   | 2.34 ± 0.37    | 1.44 ± 0.08    | 2.08 ± 0.03    | *              | **            |
| Total K             | 18.05 ± 0.71  | 19.63 ± 1.01   | 17.48 ± 0.41   | 18.93 ± 0.27   | NS             | **            |
| Urease              | 5.54 ± 0.06   | 5.48 ± 0.09    | 6.18 ± 0.06    | 5.88 ± 0.27    | NS             | NS            |
| Protease            | 0.40 ± 0.05   | 0.58 ± 0.04    | 0.51 ± 0.01    | 0.67 ± 0.01    | **             | **            |
| Sucrase             | 0.34 ± 0.07   | 0.36 ± 0.04    | 0.62 ± 0.02    | 0.64 ± 0.01    | NS             | NS            |
| Cellulose           | 0.41 ± 0.02   | 0.44 ± 0.06    | 0.42 ± 0.03    | 0.65 ± 0.01    | NS             | **            |
| Moisture            | 29.46 ± 0.58  | 30.26 ± 0.13   | 50.16 ± 0.19   | 49.95 ± 0.05   | NS             | NS            |
| pH                  | 5.57 ± 0.02   | 5.88 ± 0.01    | 4.84 ± 0.01    | 4.50 ± 0.02    | **             | **            |

Abbreviations: ammonium nitrogen (NH<sub>4</sub>-N); nitrate nitrogen (NO<sub>3</sub>-N); C, N, P, and K are common abbreviations of elements. Units are g/kg for contents of total organic C, total N, total P, and total K; while mg/kg for other nutrient contents. Meanings of hydrolase activities were showed in section Methods. Moistures are presented as percentages. The last two columns indicated the statistical significance between boreal forests: NS ( $p > 0.05$ ); \* ( $p < 0.05$ ); \*\* ( $p < 0.01$ ).

**Table S4 Relationship between soil microbial communities and soil properties (full edition)**

| Soil properties     | Soil fungi in broadleaf forests |        |                |                 | Soil fungi in coniferous forests |        |                |                 | Soil bacteria in broadleaf forests |        |                |                 | Soil bacteria in coniferous forests |        |                |                 |
|---------------------|---------------------------------|--------|----------------|-----------------|----------------------------------|--------|----------------|-----------------|------------------------------------|--------|----------------|-----------------|-------------------------------------|--------|----------------|-----------------|
|                     | RDA1                            | RDA2   | r <sup>2</sup> | <i>p</i> values | CCA1                             | CCA2   | r <sup>2</sup> | <i>p</i> values | RDA1                               | RDA2   | r <sup>2</sup> | <i>p</i> values | RDA1                                | RDA2   | r <sup>2</sup> | <i>p</i> values |
| NH <sub>4</sub> -N  | -0.955                          | 0.296  | 0.892          | 0.038 *         | -0.863                           | -0.505 | 0.599          | 0.282           | -0.993                             | -0.119 | 0.951          | 0.007 *         | -0.739                              | -0.674 | 0.709          | 0.113           |
| NO <sub>3</sub> -N  | -1.000                          | 0.030  | 0.878          | 0.075           | -0.030                           | 1.000  | 0.118          | 0.803           | -1.000                             | 0.012  | 0.672          | 0.190           | -0.991                              | 0.136  | 0.001          | 0.997           |
| Dissolved organic C | -0.996                          | 0.091  | 0.932          | 0.081           | -0.758                           | -0.653 | 0.840          | 0.056           | -0.985                             | -0.174 | 0.849          | 0.031 *         | -0.911                              | -0.412 | 0.520          | 0.368           |
| Available P         | -1.000                          | 0.014  | 0.966          | 0.050           | 0.999                            | 0.045  | 0.883          | 0.078           | -0.901                             | -0.433 | 0.792          | 0.064           | 0.965                               | 0.262  | 0.883          | 0.119           |
| Available K         | 0.910                           | -0.415 | 0.731          | 0.150           | 1.000                            | -0.002 | 0.993          | 0.038 *         | 0.570                              | 0.822  | 0.900          | 0.036 *         | 0.982                               | 0.189  | 0.995          | 0.018 *         |
| Total organic C     | -0.993                          | -0.118 | 0.309          | 0.564           | -0.948                           | 0.318  | 0.926          | 0.007 *         | -0.880                             | 0.475  | 0.333          | 0.519           | -1.000                              | 0.027  | 0.861          | 0.076           |
| Total N             | -0.664                          | 0.748  | 0.843          | 0.089           | -1.000                           | 0.033  | 0.837          | 0.094           | -0.992                             | -0.126 | 0.858          | 0.039           | -0.963                              | -0.268 | 0.843          | 0.132           |
| Total P             | -0.991                          | 0.135  | 0.975          | 0.044 *         | 0.991                            | 0.135  | 0.802          | 0.128           | -0.956                             | -0.293 | 0.876          | 0.003 *         | 0.990                               | -0.142 | 0.833          | 0.094           |
| Total K             | -0.953                          | 0.302  | 0.961          | 0.006 *         | 0.931                            | -0.365 | 0.649          | 0.208           | -0.921                             | -0.391 | 0.820          | 0.076           | 0.946                               | -0.326 | 0.723          | 0.182           |
| pH                  | 1.000                           | -0.026 | 0.990          | 0.056           | 0.996                            | 0.089  | 0.998          | 0.022 *         | 0.934                              | 0.358  | 0.793          | 0.033 *         | 0.991                               | 0.132  | 0.990          | 0.086           |
| Urease              | 0.990                           | -0.142 | 0.453          | 0.425           | -0.677                           | -0.736 | 0.443          | 0.358           | 0.686                              | 0.728  | 0.820          | 0.113           | -0.413                              | -0.911 | 0.803          | 0.069           |
| Protease            | -1.000                          | -0.029 | 0.990          | 0.039 *         | 0.973                            | 0.229  | 0.892          | 0.036 *         | -0.929                             | -0.371 | 0.756          | 0.103           | 0.943                               | 0.333  | 0.896          | 0.069           |
| Sucrase             | -0.518                          | 0.856  | 0.564          | 0.242           | 0.910                            | 0.414  | 0.076          | 0.914           | -0.998                             | -0.069 | 0.593          | 0.233           | 0.426                               | 0.905  | 0.241          | 0.631           |
| Cellulose           | -1.000                          | 0.011  | 0.951          | 0.100           | 0.987                            | -0.164 | 0.179          | 0.822           | -0.976                             | -0.219 | 0.822          | 0.022 *         | 0.582                               | 0.813  | 0.333          | 0.511           |
| Moisture            | 0.769                           | -0.639 | 0.838          | 0.083           | 0.997                            | 0.073  | 0.565          | 0.296           | 0.797                              | 0.604  | 0.530          | 0.294           | 0.994                               | 0.108  | 0.557          | 0.332           |

Abbreviations: ammonium nitrogen (NH<sub>4</sub>-N); nitrate nitrogen (NO<sub>3</sub>-N); C, N, P, and K are common abbreviations of elements. Asterisks marked the significant statistical difference (*p* <0.05).

## Supplementary figures

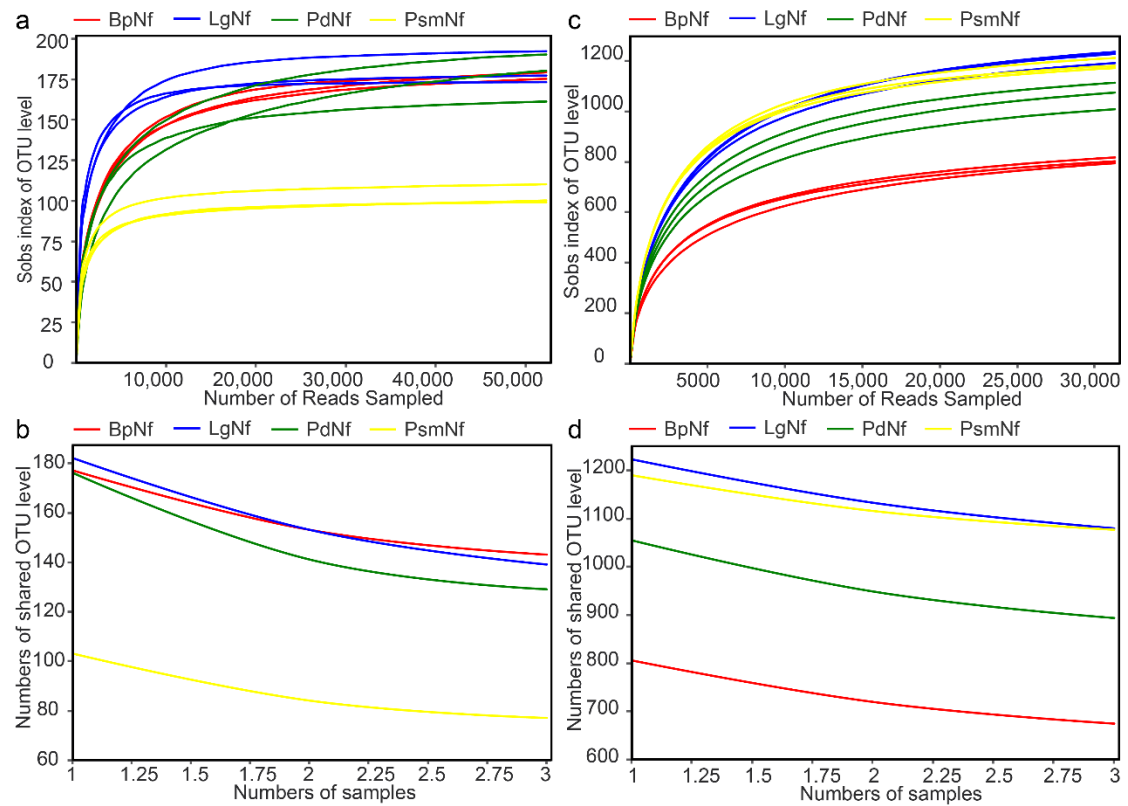

**Figure S1** Adequacy analysis of sample size at the operational taxonomic unit level. (a) Rarefaction curve analysis for soil fungi; (b) Core analysis for soil fungi; (c) Rarefaction curve analysis for soil bacteria; (d) Core analysis for soil bacteria.
